# Supplementary material for: Update on the safety profile of certolizumab pegol in rheumatoid arthritis: an integrated analysis from clinical trials
Source: HighWire-hosted journal article supplement (doi:10.1136/annrheumdis-2013-203660), 2013-10-04
Supplement: annrheumdis-2013-203660supp.pdf [file annrheumdis-2013-203660supp.pdf]

## Supplementary Materials

Table S1: Summary of clinical trials and patients included in the integrated safety update

| Type of Study                                               | Study                       | Study duration | Treatment dose                                                                                    | Steroid use                                                                                                                                                             | Number of placebo-treated patients | Number of CZP-treated patients (≥1 dose of CZP) |
|-------------------------------------------------------------|-----------------------------|----------------|---------------------------------------------------------------------------------------------------|-------------------------------------------------------------------------------------------------------------------------------------------------------------------------|------------------------------------|-------------------------------------------------|
| Uncontrolled, single dose pharmacokinetic interaction study | Study 001                   | Single dose    | Single dose CZP 400mg SC                                                                          | Patients on a stable dose of MTX                                                                                                                                        | 0                                  | 16                                              |
| Randomized controlled trials (RCTs)                         | Study 002 (NCT00993317)     | 8 weeks        | Single IV dose of CZP 1mg/kg, 5mg/kg, or 20mg/kg or PBO                                           | Not applicable                                                                                                                                                          | 12                                 | 24                                              |
|                                                             | Study 004                   | 12 weeks       | CZP 50mg, 100mg, 200mg, 400mg or PBO; CZP 600mg, 800mg or PBO Q4W SC                              | Concomitant corticosteroid use (≤ 10 mg prednisone or equivalent/day) was allowed during the study provided the doses had been stabilized prior to entry into the study | 83                                 | 240                                             |
|                                                             | Study 014 [1] (NCT00544154) | 24 weeks       | CZP 400mg Q4W SC + MTX or PBO + MTX                                                               | Corticosteroids at a dosage of ≤10 mg/day prednisone equivalent were allowed if stable for ≥4 weeks prior to study entry and thereafter                                 | 119                                | 124                                             |
|                                                             | FAST4WARD [2] (NCT00548834) | 24 weeks       | CZP 400mg Q4W SC or PBO                                                                           |                                                                                                                                                                         | 109                                | 111                                             |
|                                                             | RAPID 1 [3] (NCT00152386)   | 52 weeks       | CZP initial dose then 200mg Q2W SC + MTX or CZP initial dose then 400mg Q2W SC + MTX or PBO + MTX |                                                                                                                                                                         | 199                                | 781                                             |
|                                                             | RAPID 2 [4] (NCT00160602)   | 24 weeks       | CZP initial dose then 200mg Q2W SC + MTX or CZP initial dose then 400mg Q2W SC + MTX or PBO + MTX |                                                                                                                                                                         | 125                                | 494                                             |
|                                                             | REALISTIC [5] (NCT00717236) | 12 weeks       | CZP initial dose then 200mg Q2W SC +/- DMARDs or                                                  |                                                                                                                                                                         | 209                                | 846                                             |

|                                                                |                                                     |                 |                                                                                                                                                               |                                                                                                                                                                               |     |     |
|----------------------------------------------------------------|-----------------------------------------------------|-----------------|---------------------------------------------------------------------------------------------------------------------------------------------------------------|-------------------------------------------------------------------------------------------------------------------------------------------------------------------------------|-----|-----|
|                                                                |                                                     |                 | PBO +/- DMARDs                                                                                                                                                | for 7 days prior to study entry                                                                                                                                               |     |     |
|                                                                | CERTAIN<br>(NCT00674362)                            | 52 weeks        | CZP initial dose then 200mg Q2W SC + DMARDs<br>or PBO + DMARDs                                                                                                |                                                                                                                                                                               | 98  | 96  |
|                                                                | DOSEFLEX<br>(NCT00580840)                           | 16 weeks        | CZP initial dose then 200mg Q2W SC up to wk 16<br>ACR20 responders randomized to CZP 200mg Q2W SC + MTX<br>or<br>CZP 400mg Q4W SC + MTX<br>or<br>or PBO + MTX | Corticosteroids at a dosage of $\leq 10$ mg/day prednisone equivalent were allowed if stable for $\geq 4$ weeks prior to study entry                                          | 69  | 139 |
|                                                                | Study RA0017<br>(vaccination study;<br>NCT00993668) | 6 weeks         | CZP initial dose then 200 mg Q2W SC or PBO                                                                                                                    | Patients were allowed to continue their prestudy dosages of oral corticosteroids (prednisone equivalent $\leq 10$ mg/day)                                                     | 114 | 110 |
| Open label extensions (OLEs) or open label portions of studies | 002                                                 | 8 weeks         | Single IV dose of CZP 1mg/kg, 5mg/kg, or 20mg/kg                                                                                                              | Not applicable                                                                                                                                                                | -   | 32  |
|                                                                | 004 OLE                                             | Up to 104 weeks | CZP 200 mg or 400 mg Q4W SC                                                                                                                                   | Concomitant corticosteroid use ( $\leq 10$ mg prednisone or equivalent/day) was allowed during the study provided the doses had been stabilized prior to entry into the study | -   | 298 |
|                                                                | 015<br>(OLE of FAST4WARD and 014;<br>NCT00160693)   | Up to 364 weeks | CZP 400 mg SC Q4W                                                                                                                                             |                                                                                                                                                                               | -   | 402 |
|                                                                | 028<br>(OLE of RAPID 1;<br>NCT00175877)             | Ongoing         | CZP 400 mg SC Q2W decreased to CZP 200 mg SC Q2W                                                                                                              | Corticosteroids at a dosage of $\leq 10$ mg/day prednisone equivalent were allowed if stable for $\geq 4$ weeks prior to study entry and thereafter                           | -   | 846 |
|                                                                | 051<br>(OLE of RAPID 2;<br>NCT00160641)             | Ongoing         | CZP 400 mg SC Q2W decreased to CZP 200 mg SC Q2W                                                                                                              |                                                                                                                                                                               | -   | 567 |

|  |                                                                                    |          |                                         |                                                                                                                                      |   |     |
|--|------------------------------------------------------------------------------------|----------|-----------------------------------------|--------------------------------------------------------------------------------------------------------------------------------------|---|-----|
|  | REALISTIC OLE                                                                      | 16 weeks | CZP 200 mg SC Q2W                       | Corticosteroids at a dosage of $\leq 10$ mg/day prednisone equivalent were allowed if stable for 7 days prior to study entry         | - | 954 |
|  | DOSEFLEX (pre-randomisation open label run-in period for the RCT)<br>(NCT00580840) | 18 weeks | CZP initial dose then CZP 200 mg SC Q2W | Corticosteroids at a dosage of $\leq 10$ mg/day prednisone equivalent were allowed if stable for $\geq 4$ weeks prior to study entry | - | 333 |
|  | Study RA0017 OLE                                                                   | 26 weeks | CZP 200 mg SC Q2W                       | Patients were allowed to continue their prestudy dosages of oral corticosteroids (prednisone equivalent $\leq 10$ mg/day)            | - | 215 |

PBO=placebo; SC=subcutaneous; Q4W=every 4 weeks; Q2W=every 2 weeks  
CZP initial dose = CZP 400 mg SC at W0, 2, and 4

Table S2: Overall serious infection event ER and IR over time in the RCT and RCT+OLE populations

| Population | Exposure (months)  | Treatment group | ER / 100 PY | ER OR | ER 95% CI Low* | ER 95% CI High* | IR / 100 PY | IR OR | IR 95% CI Low* | IR 95% CI High* |
|------------|--------------------|-----------------|-------------|-------|----------------|-----------------|-------------|-------|----------------|-----------------|
| RCT        | All                | Placebo         | 1.34        | 4.81  | 0.72           | 31.99           | 1.35        | 4.35  | 0.65           | 29.30           |
|            |                    | CZP all doses   | 6.14        |       |                |                 | 5.61        |       |                |                 |
|            | Onset between 0-<3 | Placebo         | 0.79        | 10.67 | 1.04           | 109.74          | 0.79        | 9.67  | 0.93           | 100.30          |
|            |                    | CZP all doses   | 7.87        |       |                |                 | 7.19        |       |                |                 |
|            | Onset between 3-<6 | Placebo         | 3.19        | 1.77  | 0.43           | 7.25            | 3.21        | 1.57  | 0.37           | 6.60            |
|            |                    | CZP all doses   | 5.52        |       |                |                 | 4.94        |       |                |                 |
|            | Onset between 6-12 | Placebo         | 0           | -     | -              | -               | 0           | -     | -              | -               |
|            |                    | CZP all doses   | 2.88        |       |                |                 | 2.90        |       |                |                 |
| RCT+OLE    | All                | CZP all doses   | 4.33        | **    | **             | **              | 3.65        | **    | **             | **              |

CI=Confidence interval, ER=Event rate, IR=Incidence rate, OR=Odds ratio, '-'=OR and 95% CI impossible to calculate due to 0 event in the placebo group, CZP all dose group includes CZP 400 Q2W data (twice the registered dose)

Odds ratio is the ratio of the probability that an event will happen within 100 PY to the probability that it will not happen within 100 PY in the CZP group as compared to the control group

\*CIs were created using a normal approximation to the sampling distribution of the natural log odds ratio, CI around OR of rare events should be interpreted with caution with respect to rare events due to the asymptotic approximation of the CI's.

\*\* As there is no placebo during OLE, OR are not relevant for long term exposure.

**Table S3: List of OIs developed by independent physicians and validated by the SC**

|                                                                                                                                                                                                                                                                                                                                                                                                                                                                                                                                                                                                                                                                                                                                                                                                                                                                                                                                                                                                                                                                                                                                                                                                                                                                                                                                                                   |
|-------------------------------------------------------------------------------------------------------------------------------------------------------------------------------------------------------------------------------------------------------------------------------------------------------------------------------------------------------------------------------------------------------------------------------------------------------------------------------------------------------------------------------------------------------------------------------------------------------------------------------------------------------------------------------------------------------------------------------------------------------------------------------------------------------------------------------------------------------------------------------------------------------------------------------------------------------------------------------------------------------------------------------------------------------------------------------------------------------------------------------------------------------------------------------------------------------------------------------------------------------------------------------------------------------------------------------------------------------------------|
| <ul style="list-style-type: none"> <li>• Actinomyces</li> <li>• Aspergillus (invasive forms only)</li> <li>• Bartonella</li> <li>• Blastomyces species</li> <li>• Brucella</li> <li>• Campylobacter (invasive disease only)</li> <li>• Candida species (excluding vaginal candidiasis)</li> <li>• Chagas disease (T. cruzi)</li> <li>• Coccidioides immitis/posadasii</li> <li>• Coxiella (Q fever)</li> <li>• Cryptococcus neoformans/gatii</li> <li>• Cryptosporidium species</li> <li>• Cytomegalovirus</li> <li>• Fusarium</li> <li>• Herpes simplex (all forms)</li> <li>• Herpes zoster (all forms)</li> <li>• Histoplasma species</li> <li>• Isosporiasis</li> <li>• Leishmaniasis</li> <li>• Leptospirosis</li> <li>• Listeria monocytogenes (systemic)</li> <li>• Malaria</li> <li>• Microsporidia</li> <li>• Mucomycosis (=zygomycosis) [Rhizopus, Mucor, and Absidia]</li> <li>• Mycobacterium tuberculosis</li> <li>• Nocardia species</li> <li>• Nontuberculous mycobacterium</li> <li>• Paracoccidioides infections</li> <li>• Progressive multifocal leukoencephalopathy (PML, JC virus)</li> <li>• Pneumocystis jiroveci (carinii)</li> <li>• Salmonella (invasive disease only)</li> <li>• Scedosporum / Pseudallescheria boydii</li> <li>• Shigella (invasive disease only)</li> <li>• Sporothrix schenckii</li> <li>• Toxoplasmosis</li> </ul> |
|-------------------------------------------------------------------------------------------------------------------------------------------------------------------------------------------------------------------------------------------------------------------------------------------------------------------------------------------------------------------------------------------------------------------------------------------------------------------------------------------------------------------------------------------------------------------------------------------------------------------------------------------------------------------------------------------------------------------------------------------------------------------------------------------------------------------------------------------------------------------------------------------------------------------------------------------------------------------------------------------------------------------------------------------------------------------------------------------------------------------------------------------------------------------------------------------------------------------------------------------------------------------------------------------------------------------------------------------------------------------|

Table S4: Serious adverse events by preferred term reported at an event rate of  $\geq 0.3/100$  PY for CZP-treated patients (all doses) in RCTs or RCT+OLEs

| Preferred Term              | RCTs<br>PBO (n=1137)  |                     | RCTs<br>CZP (n=2965)  |                     | RCTs & OLEs<br>CZP (n=4049) |                     |
|-----------------------------|-----------------------|---------------------|-----------------------|---------------------|-----------------------------|---------------------|
|                             | ER/100 PY<br>(95% CI) | Number of<br>events | ER/100 PY<br>(95% CI) | Number of<br>events | ER/100 PY<br>(95% CI)       | Number of<br>events |
| Pneumonia                   | 0.54<br>(0.09-2.14)   | 2                   | 0.77<br>(0.39-1.46)   | 10                  | 0.77<br>(0.60-0.97)         | 71                  |
| Osteoarthritis              | 0.27<br>(0.01-1.72)   | 1                   | 0.08<br>(0.00-0.50)   | 1                   | 0.52<br>(0.39-0.69)         | 48                  |
| Cellulitis                  | 0                     | 0                   | 0.38<br>(0.14-0.95)   | 5                   | 0.31<br>(0.21-0.45)         | 29                  |
| Cholelithiasis              | 0                     | 0                   | 0.31<br>(0.10-0.84)   | 4                   | 0.20<br>(0.13-0.33)         | 19                  |
| Cerebrovascular<br>accident | 0.54<br>(0.09-2.14)   | 2                   | 0.31<br>(0.10-0.84)   | 4                   | 0.17<br>(0.10-0.29)         | 16                  |
| Osteonecrosis               | 0                     | 0                   | 0.38<br>(0.14-0.95)   | 5                   | 0.16<br>(0.09-0.27)         | 15                  |

| Preferred Term              | <i>RCTs</i><br>PBO (n=1137) |                     | <i>RCTs</i><br>CZP (n=2965) |                     | <i>RCTs &amp; OLEs</i><br>CZP (n=4049) |                     |
|-----------------------------|-----------------------------|---------------------|-----------------------------|---------------------|----------------------------------------|---------------------|
|                             | ER/100 PY<br>(95% CI)       | Number of<br>events | ER/100 PY<br>(95% CI)       | Number of<br>events | ER/100 PY<br>(95% CI)                  | Number of<br>events |
| Erysipelas                  | 0                           | 0                   | 0.38<br>(0.14-0.95)         | 5                   | 0.11<br>(0.05-0.21)                    | 10                  |
| Pyrexia                     | 0.27<br>(0.01-1.72)         | 1                   | 0.46<br>(0.19-1.05)         | 6                   | 0.14<br>(0.08-0.25)                    | 13                  |
| Abdominal pain              | 0.27<br>(0.01-1.72)         | 1                   | 0.38<br>(0.14-0.95)         | 5                   | 0.12<br>(0.06-0.22)                    | 11                  |
| Acute myocardial infarction | 0.27<br>(0.01-1.72)         | 1                   | 0.38<br>(0.14-0.95)         | 5                   | 0.12<br>(0.06-0.22)                    | 11                  |

Table S5: Shift in biochemistry values from normal at baseline to markedly abnormal grade 3 or 4 post-baseline (safety population)

| Parameter                        | <i>RCTs<sup>a</sup></i><br>Placebo<br>(n=1125) |                               | <i>RCTs<sup>a</sup></i><br>CZP<br>(n=2941) |                               | <i>Open label</i><br>CZP <sup>b</sup><br>(n=3630) |                               |
|----------------------------------|------------------------------------------------|-------------------------------|--------------------------------------------|-------------------------------|---------------------------------------------------|-------------------------------|
|                                  | Low grade 3<br>or 4<br>n (%)                   | High grade 3<br>or 4<br>n (%) | Low grade 3 or<br>4<br>n (%)               | High grade 3 or<br>4<br>n (%) | Low grade 3 or<br>4<br>n (%)                      | High grade 3 or<br>4<br>n (%) |
| Alkaline phosphatase (U/L)       | NA                                             | 1 (0.1)                       | NA                                         | 2 (0.1)                       | NA                                                | 4 (0.1)                       |
| Alanine aminotransferase (U/L)   | NA                                             | 10 (0.9)                      | NA                                         | 39 (1.3)                      | NA                                                | 66 (1.8)                      |
| Aspartate aminotransferase (U/L) | NA                                             | 8 (0.7)                       | NA                                         | 25 (0.9)                      | NA                                                | 46 (1.3)                      |
| Bilirubin (µmol/L)               | NA                                             | 0                             | NA                                         | 2 (0.1)                       | NA                                                | 5 (0.1)                       |
| Calcium (mmol/L)                 | 1 (0.1)                                        | 0                             | 2 (0.1)                                    | 0                             | 6 (0.2)                                           | 0                             |
| Creatine phosphokinase (U/L)     | NA                                             | 3 (0.3)                       | NA                                         | 16 (0.5)                      | NA                                                | 15 (0.4)                      |
| Creatinine (µmol/L)              | NA                                             | 1 (0.1)                       | NA                                         | 2 (0.1)                       | NA                                                | 16 (0.4)                      |
| Glucose (mmol/L)                 | 0                                              | 5 (0.4)                       | 5 (0.2)                                    | 15 (0.5)                      | 7 (0.2)                                           | 43 (1.2)                      |
| Potassium (mmol/L)               | 1 (0.1)                                        | 2 (0.2)                       | 1 (0.0)                                    | 3 (0.1)                       | 9 (0.2)                                           | 10 (0.3)                      |
| Sodium (mmol/L)                  | 0                                              | NA                            | 3 (0.1)                                    | NA                            | 5 (0.1)                                           | NA                            |
| Urate (µmol/L)                   | NA                                             | 0                             | NA                                         | 0                             | NA                                                | 0                             |

NA=not applicable, 'High' and 'Low' refer to parameter levels that were abnormally high or abnormally low. Only Grade 3 and 4 adverse events are reported, as defined by the RCTC.<sup>25</sup>

Note: Baseline refers to data collected prior to study medication administration in any study or study phase.

<sup>a</sup>C87002 was not included due to its single-dose design. The total number of subjects (excluding those in C87002) was used as the denominator for percentages.

<sup>b</sup>CZP-treated patients in open label studies or open label portions of studies only. PHA001 and C87002 were not included due to their single-dose design. The total number of subjects (excluding those in PHA001 and C87002) was used as the denominator for percentages. CZP all dose, including 400 mg Q2W (twice registered dose)

Figure S1: Study designs of the trials included in this CZP RA data pooling

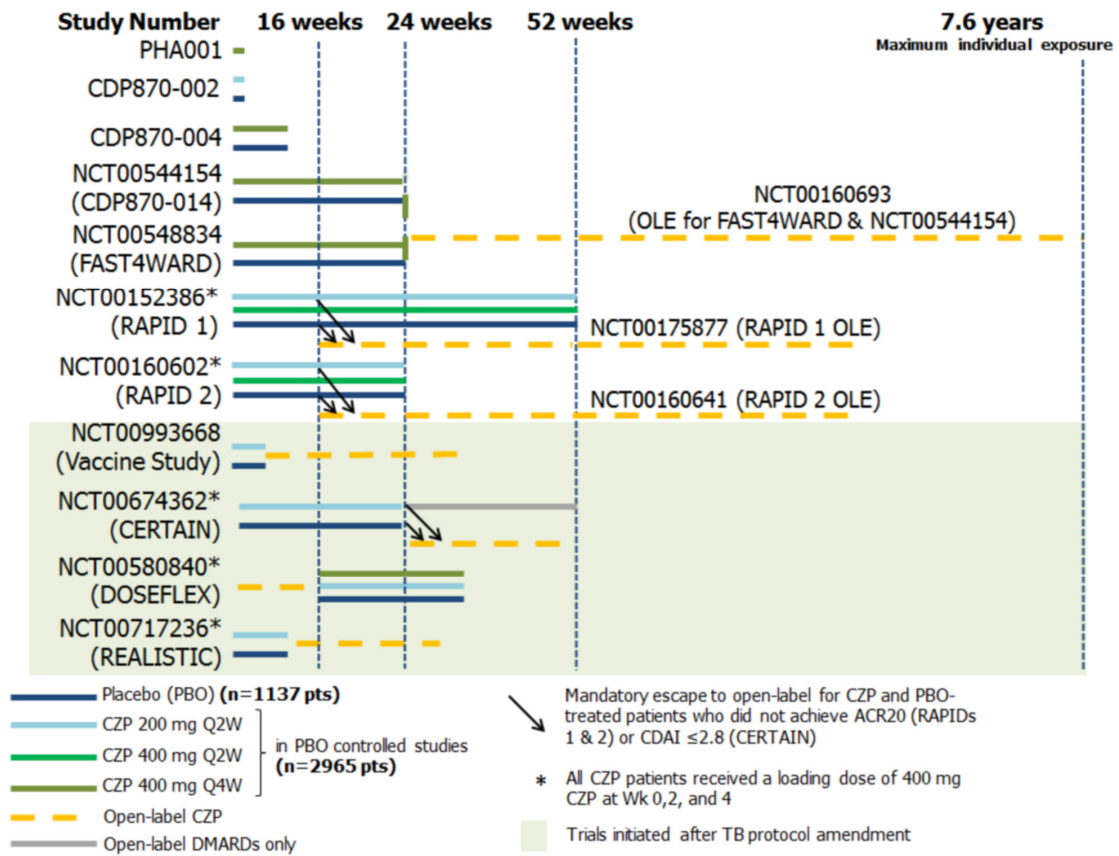

Figure S2: Exposure durations used in the calculation of incidence and event rates

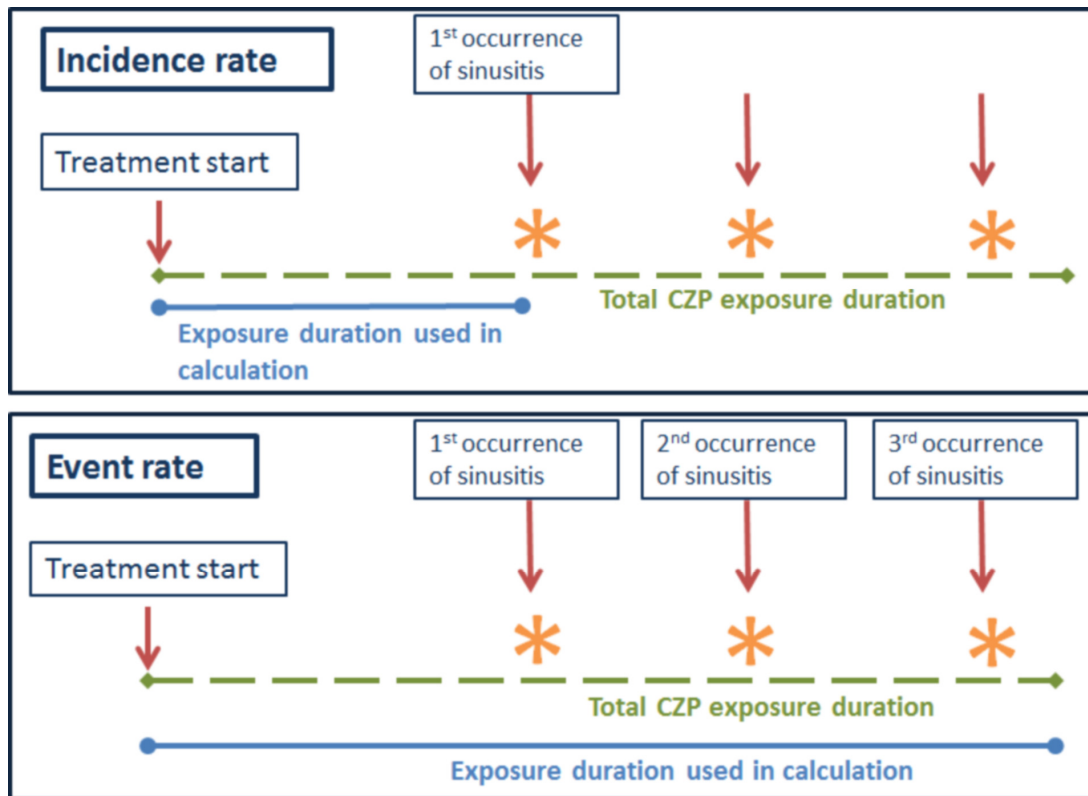



1. Choy E, McKenna F, Vencovsky J, et al. Certolizumab pegol plus MTX administered every 4 weeks is effective in patients with RA who are partial responders to MTX. *Rheumatology (Oxford)* 2012;51(7):1226-34 doi: 10.1093/rheumatology/ker519 [published Online First: 22 February 2012].
2. Fleischmann R, Vencovsky J, van Vollenhoven RF, et al. Efficacy and safety of certolizumab pegol monotherapy every 4 weeks in patients with rheumatoid arthritis failing previous disease-modifying antirheumatic therapy: the FAST4WARD study. *Ann Rheum Dis* 2009;68(6):805.
3. Keystone E, Heijde D, Mason D, et al. Certolizumab pegol plus methotrexate is significantly more effective than placebo plus methotrexate in active rheumatoid arthritis: findings of a fifty-two-week, phase III, multicenter, randomized, double-blind, placebo-controlled, parallel-group study. *Arthritis Rheum* 2008;58(11):3319-29.
4. Smolen J, Landewé RB, Mease P, et al. Efficacy and safety of certolizumab pegol plus methotrexate in active rheumatoid arthritis: the RAPID 2 study. A randomised controlled trial. *Ann Rheum Dis* 2009;68(6):797.
5. Weinblatt M. Efficacy and safety of certolizumab pegol in a broad population of patients with active rheumatoid arthritis: results from the phase IIIb REALISTIC study. *Rheumatology (Oxford)* 2012;51(12):2204-14 doi: 10.1093/rheumatology/kes150 [published Online First: 25 August 2012].
